# Supplementary material for: Epigallocatechin-3-Gallate Improves Intestinal Gut Microbiota Homeostasis and Ameliorates Clostridioides difficile Infection
Source: MDPI journal article supplement (doi:10.3390/nu14183756), 2022-09-11

# **Epigallocatechin-3-gallate improves intestinal gut microbiota homeostasis and ameliorates *Clostridioides difficile* infection**

## **Supplementary Methods**

### **16S rRNA gene sequencing**

Fecal DNA was collected from mice prior to execution and isolated using the DNA PowerSoil Kit (Qiagen, Valencia, USA). The V3-V4 variable region was amplified using universal primers (Table S1). The PCR products were extracted, purified and sequenced on an Illumina NovaSeq platform. Raw sequencing data were filtering, denoised, merged and detect using DADA2 [1] with QIIME2 [2]. The representative reads of amplicon sequence variants (ASVs) were annotated and blasted against Silva database Version 138. The microbial diversity was estimated using the alpha diversity (Shannon, Simpson, and Chao1 indices). Beta diversity Principal coordinates analysis (PCoA) was performed based on Bray–Curtis. Linear discriminant analysis (LDA) coupled with effect size measurements (LEfSe) was used to compare composition differences between groups. The 16S rRNA gene sequencing data are available at NCBI's Sequence Read Archive (SRA) database under the BioProject accession code PRJNA867379.

## **References**

1. Callahan, B.J.; McMurdie, P.J.; Rosen, M.J.; Han, A.W.; Johnson, A.J.; Holmes, S.P. DADA2: High-resolution sample inference from Illumina amplicon data. *Nat Methods* 2016, 13, 581-583, doi:10.1038/nmeth.3869.
2. Bolyen, E.; Rideout, J.R.; Dillon, M.R.; Bokulich, N.A.; Abnet, C.C.; Al-Ghalith, G.A.; Alexander, H.; Alm, E.J.; Arumugam, M.; Asnicar, F.; et al. Reproducible, interactive, scalable and extensible microbiome data science using QIIME 2. *Nat Biotechnol* 2019, 37, 852-857, doi:10.1038/s41587-019-0209-9.

**Supplementary Table S1. PCR primers.**

| <b>Gene</b>                      | <b>Forward Sequence (5'-3')</b> | <b>Reverse Sequence (5'-3')</b> |
|----------------------------------|---------------------------------|---------------------------------|
| <b>β-actin</b>                   | <b>AGTGTGACGTTGACATCCGT</b>     | <b>GCAGCTCAGTAACAGTCCGC</b>     |
| <b>Occludin</b>                  | <b>TTCCTCTGACCTTGAGTGTGG</b>    | <b>CTCTTGCCCTTTCCTGCTTT</b>     |
| <b>ZO-1</b>                      | <b>GCCGCTAAGAGCACAGCAA</b>      | <b>GCCCTCCTTTTAAACACATCAGA</b>  |
| <b>MUC2</b>                      | <b>ATGCCCACCTCCTCAAAGAC</b>     | <b>GTAGTTTCCGTTGGAACAGTGAA</b>  |
| <b>Bacteria16S<br/>rRNA V3V4</b> | <b>TACGGRAGGCAGCAG</b>          | <b>AGGGTATCTAATCCT</b>          |

Supplementary Figure S1. The rarefaction curve of ASVs.

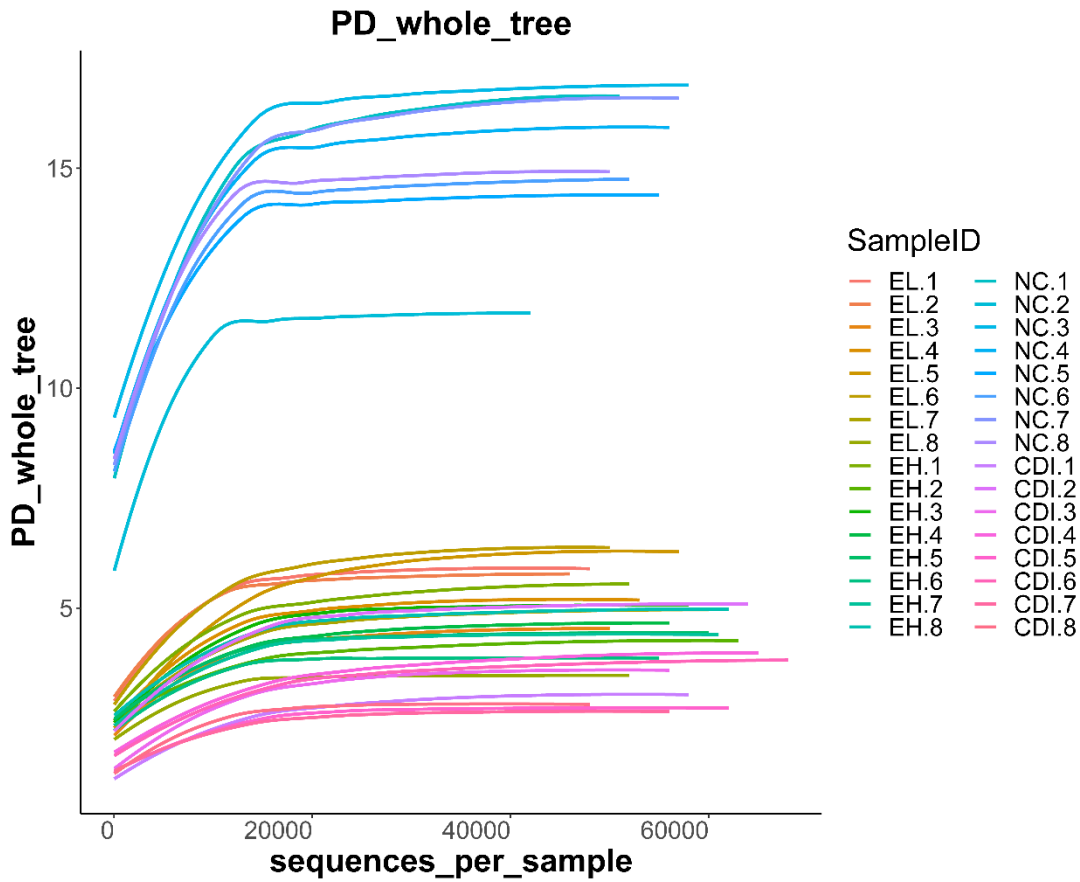

**Supplementary Figure S2. Relative abundance of the most abundant taxa at the genus level.**

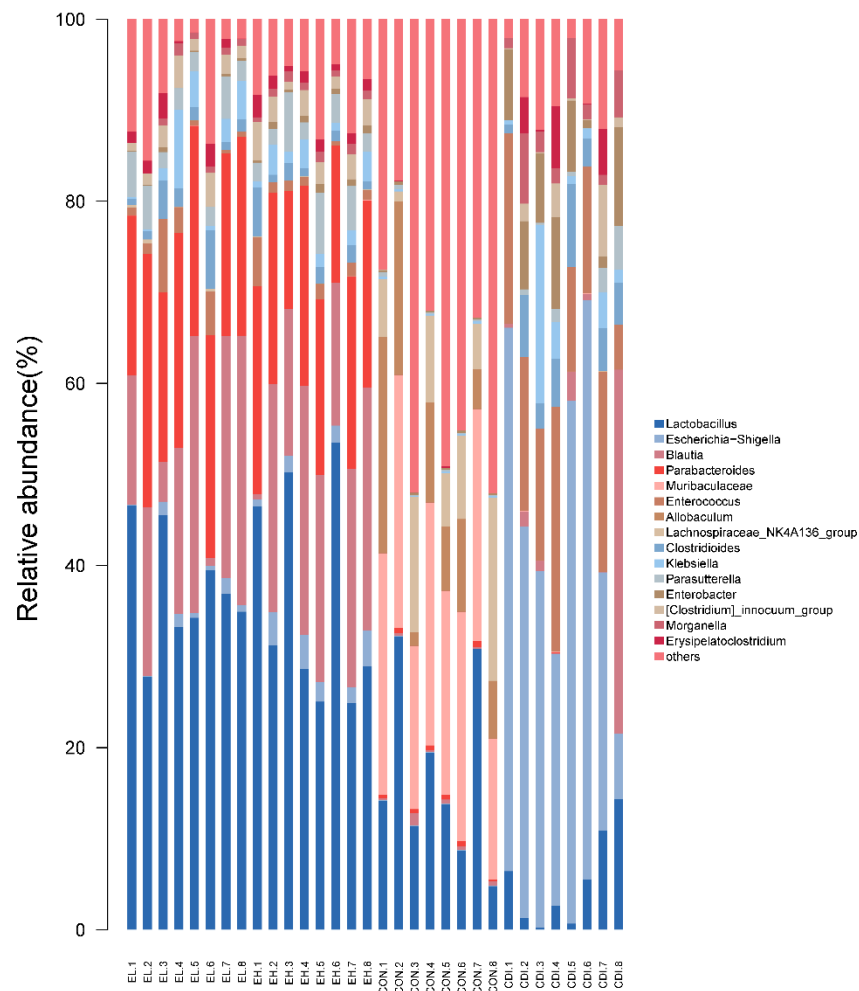

Supplementary Figure S3. Top ten abundance of differential taxa between groups.

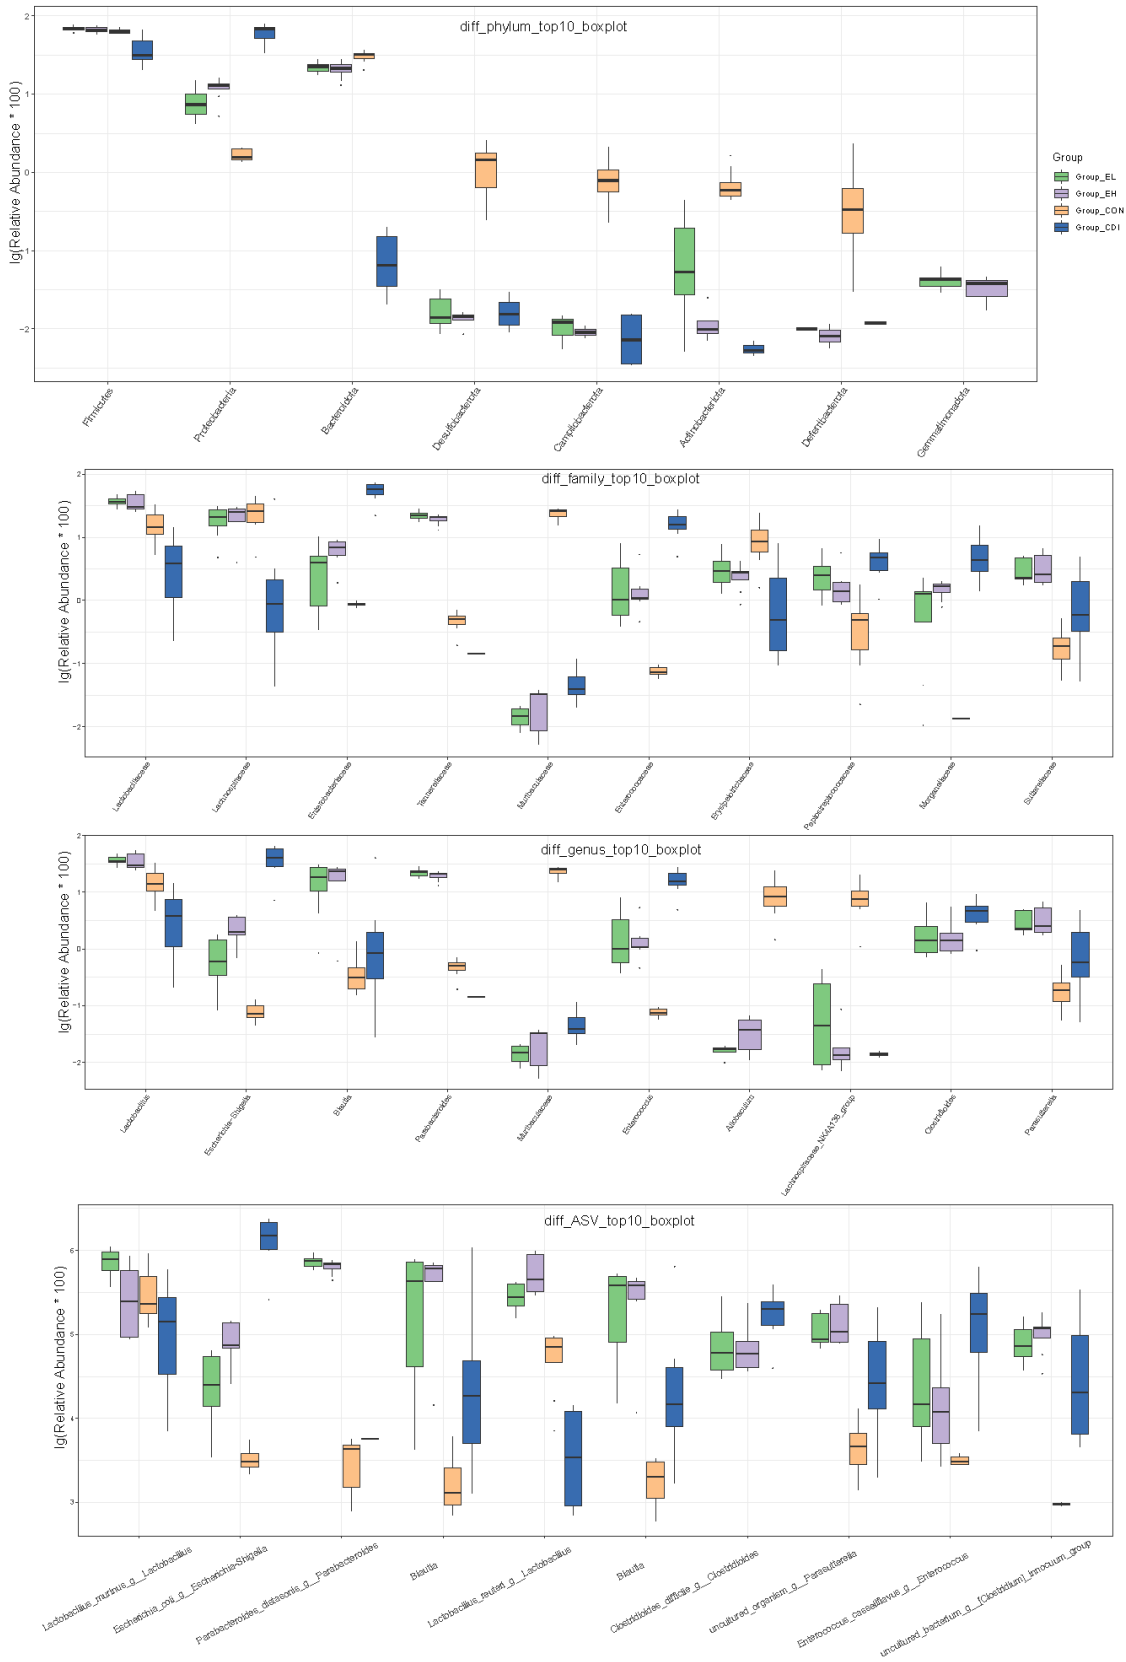

### Supplementary Figure S4. Linear discriminant analysis (LDA) effectsize

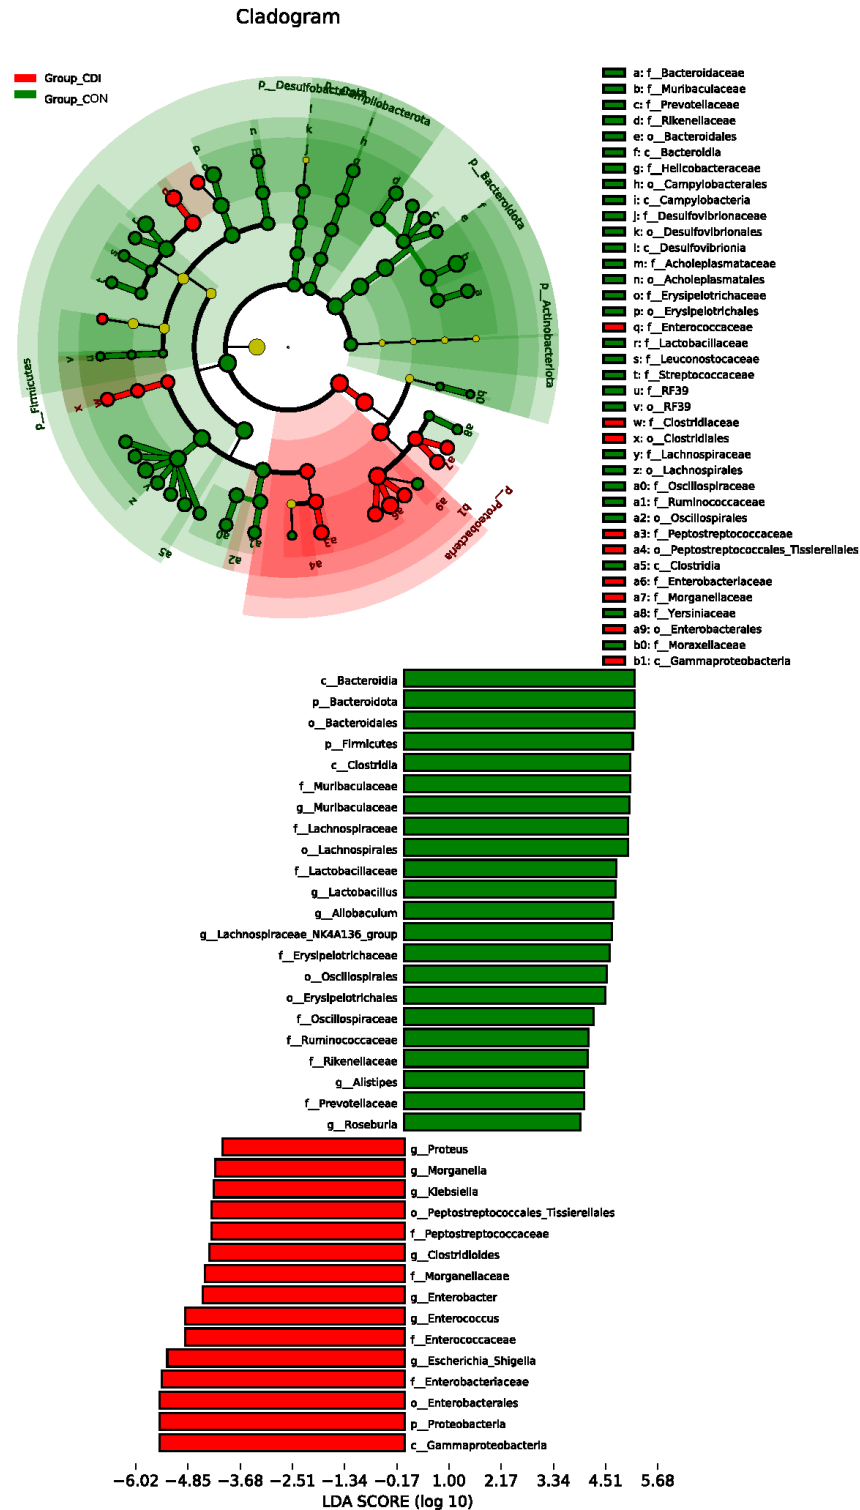

**Supplementary Figure S5. The bacterial taxa of the EH group were compared with those of the CDI group.**

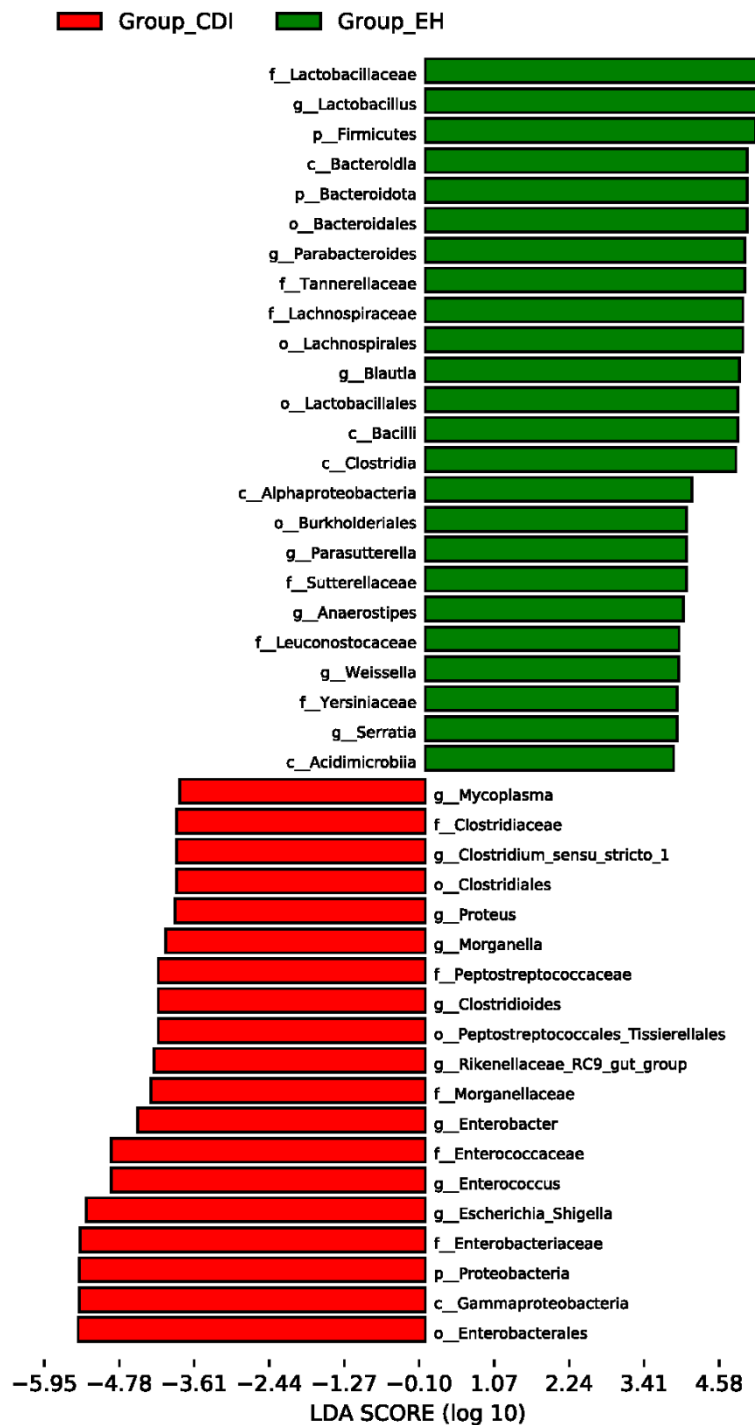

Supplementary Figure S6. Linear discriminant analysis (LDA) effectsize (LEfSe) analysis among EL and CDI group.

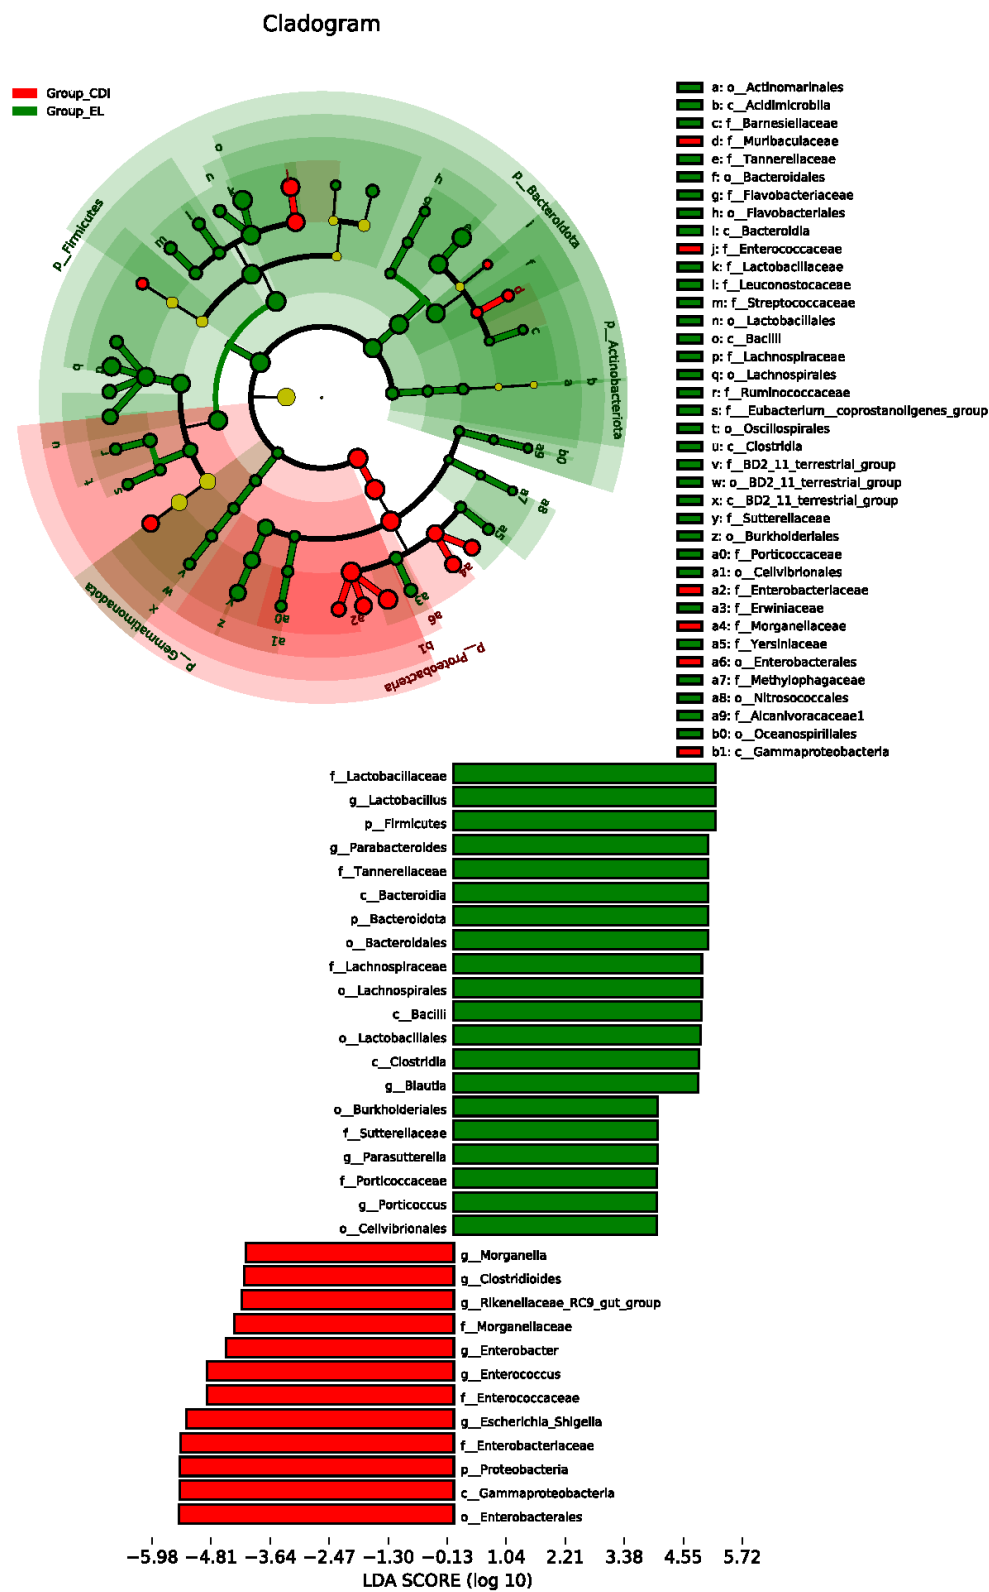



**Supplementary Figure S7. OPLS-DA plot showing the metabolic profiles of the CDI and EL groups.**

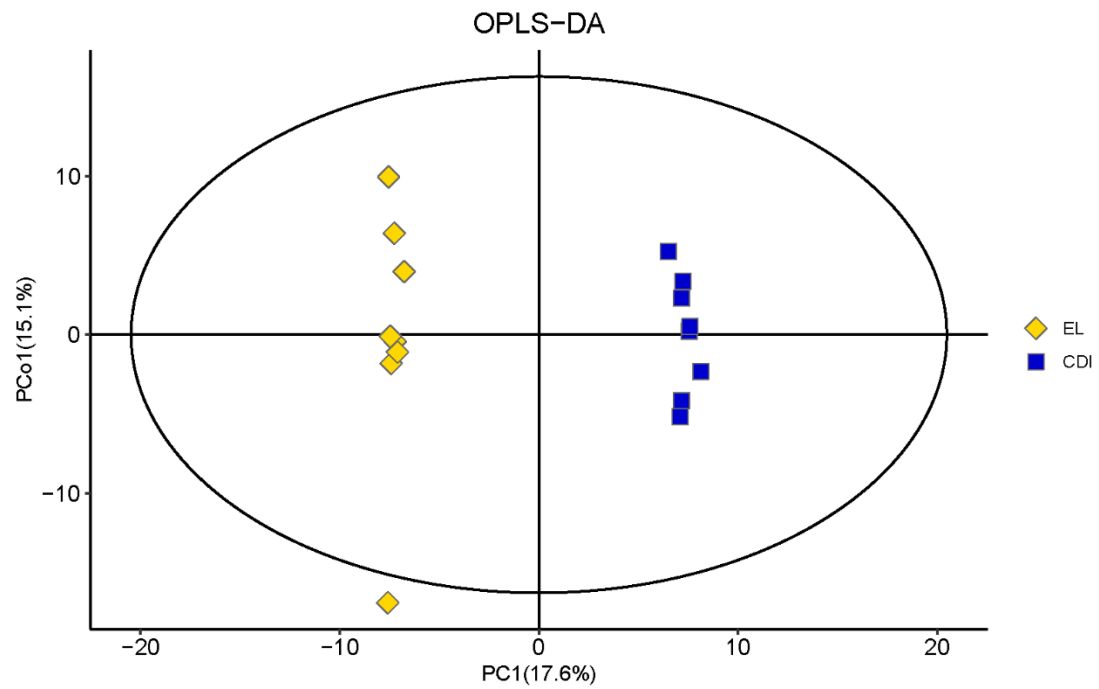

**Supplementary Figure S8. A hierarchical clustering heatmap of normalized (Z-score) levels visualizing significantly altered metabolites between the CDI and EH groups.**

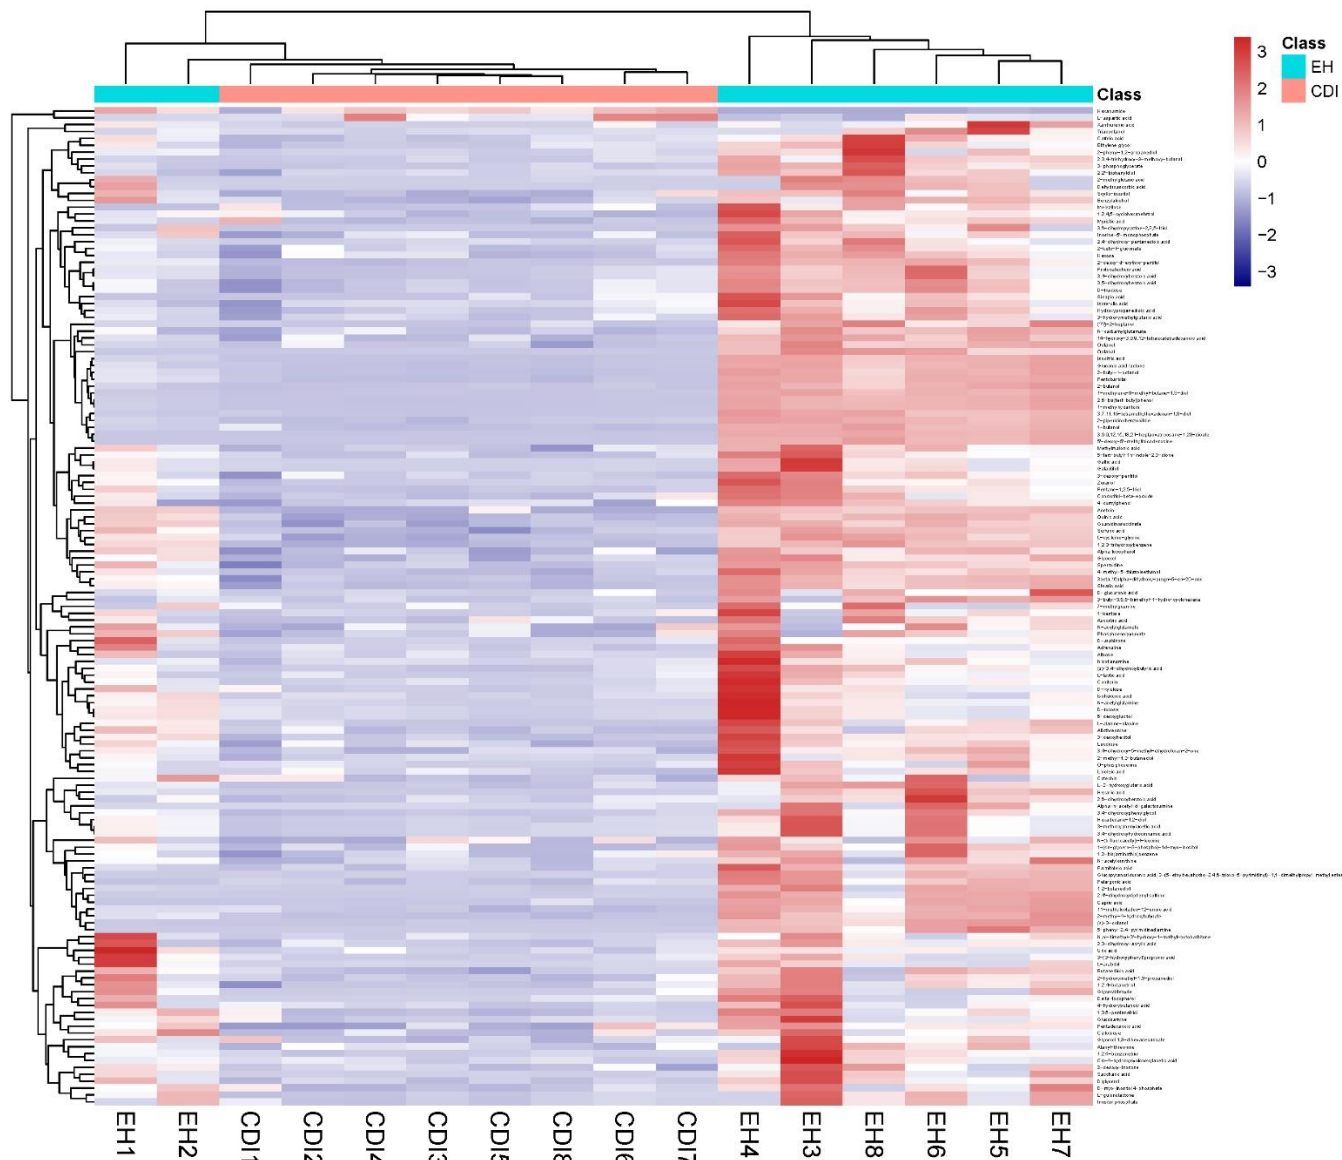

**Supplementary Figure S9. The levels of SCFAs between different groups.** The data are expressed as the mean  $\pm$  SEM. \*,  $P < 0.05$ ; \*,  $P < 0.01$ ; and \*\*,  $P < 0.001$ .

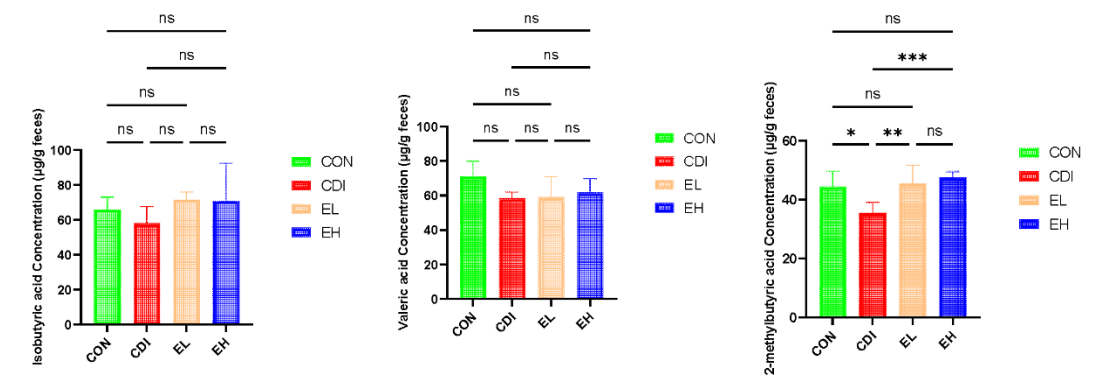

Supplement: s1 [file s1]
